# Supplementary material for: Carbon-framework-encapsulated CoMn2O4spinel derived from electrospun nanofiber couplingviathe photothermal approach reinforces PMS activation to eliminate 2,4-dichlorophenol
Source: Royal Society of Chemistry journal article supplement (doi:10.1039/d2qm00490a), 2022-01-01
Supplement: d2qm00490a1.pdf [file d2qm00490a1.pdf]

## Carbon framework encapsulated $\text{CoMn}_2\text{O}_4$ spinel derived from electrospun nanofiber coupling with photothermal approach reinforces PMS activation to eliminate 2,4-dichlorophenol

Fu Yang<sup>\*,#,a</sup>, Yutong Lu<sup>#,a</sup>, Mengting Liu, Shiqi Yang<sup>a</sup>, Wenlong Tu<sup>a</sup>, Wuxiang Zhang<sup>a</sup>, Chengzhang Zhu<sup>a</sup>, Zengjing Guo<sup>b</sup>, Aihua Yuan<sup>\*,a</sup>

<sup>a</sup> School of Environmental and Chemical Engineering, Jiangsu University of Science and Technology, Zhenjiang 212003, Jiangsu, P. R. China

<sup>b</sup> School of Chemistry and Chemical Engineering, Liaocheng University, Liaocheng, 252000, Shandong, P. R. China

<sup>#</sup> These authors equally contributed to this work.

\*Corresponding authors: E-mail: Prof. Fu Yang, [fuyang@just.edu.cn](mailto:fuyang@just.edu.cn); Prof. Aihua Yuan, [aihua.yuan@just.edu.cn](mailto:aihua.yuan@just.edu.cn)

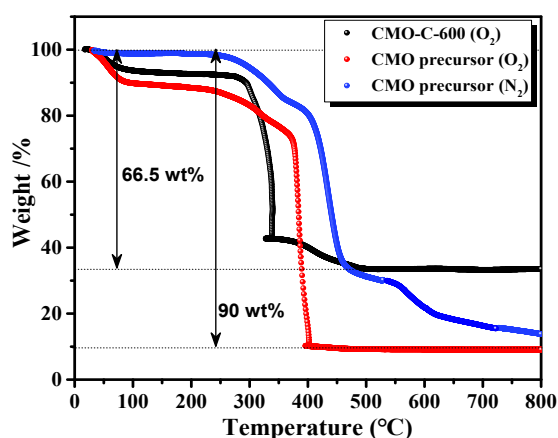

**Fig. S1** TG profiles of fiber precursor CMO and catalyst CMO-N-600 under different atmospheres.

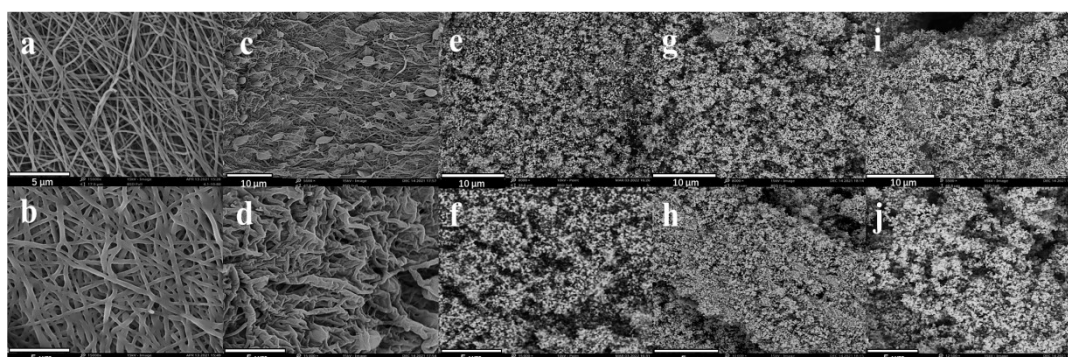

**Fig. S2** Representative SEM images of fiber precursor (a, b), CMO-C-500 (c, d), CMO-C-600 (e, f), CMO-C-700 (g, h), and CMO-C-800 (i, j).

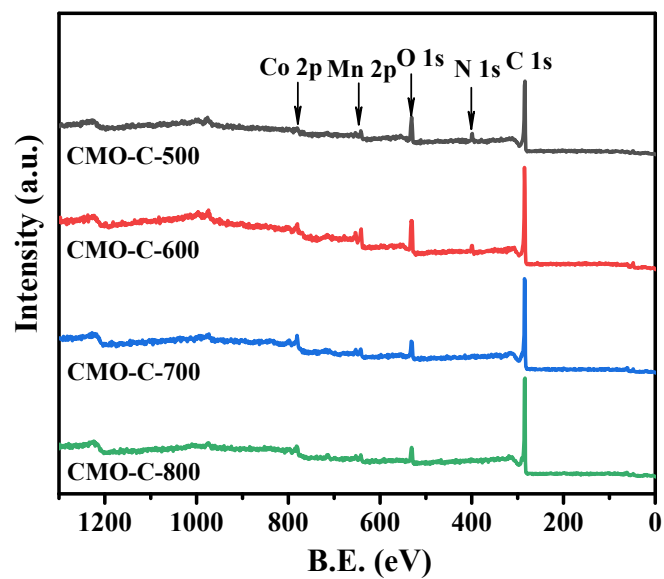

**Fig. S3** XPS survey of comparative catalysts of CMO-C-X series .

**Table S1.** The statistics of active elemental species extracted from ICP and XPS results

| Samples   | Co/Mn <sup>a</sup> (a.r.) | Co <sup>2+</sup> /(Co)<br>(rt.%) | Mn <sup>3+</sup> /(Mn)<br>(rt.%) | M-O-C/(O)<br>(rt.%) |
|-----------|---------------------------|----------------------------------|----------------------------------|---------------------|
| CMO-C-500 | 0.95                      | 43.20                            | 27.18                            | 3.69                |
| CMO-C-600 | 1.13                      | 58.64                            | 47.55                            | 14.10               |
| CMO-C-700 | 1.10                      | 49.51                            | 38.55                            | 7.77                |
| CMO-C-800 | 1.05                      | 47.84                            | 34.39                            | 6.82                |

<sup>a</sup> The overall metal element content contents were obtained from ICP measurement.
